# Supplementary material for: Metal dication cross-linked polymer network colloids as an approach to form and stabilize unusually small metal nanoparticles
Source: Royal Society of Chemistry journal article supplement (doi:10.1039/c3cc41778f), 2013-01-01
Supplement: c3cc41778f.pdf [file c3cc41778f.pdf]

## Supporting information for:

# Metal Dication Cross-Linked Polymer Network Colloids as an Approach to Form and Stabilize Unusually Small Metal Nanoparticles

Zichuan Ye, Behzad Tangeysh and Bradford B. Wayland\*

Department of Chemistry, Temple University, Philadelphia, PA 19122

## Contents:

### Experiments:

All materials were purchased from Sigma-Aldrich (Milwaukee, WI) and used as received. An example of hydrazine reduction of  $\text{Cu}^{+2}$  precursor was prepared as following: aqueous stock solutions of  $\text{Cu}(\text{BF}_4)_2$  (0.05 M) and NaPA (0.002 M) were prepared before mixed. While being monitored in UV-vis spectroscopy, an aliquot amount of  $\text{Cu}(\text{BF}_4)_2$  solution was slowly titrated into a vial in which contained the NaPA solution until the baseline shift of absorbance occurred. Then,  $\text{Cu}(\text{BF}_4)_2$  solution was added into the vial at a rate 0.01 mL/s before desired concentrations of  $\text{Cu}^{+2}$  and NaPA were reached. The vial was then sealed and bubbled with  $\text{N}_2$  gas for 15 minutes before a fresh-made hydrazine solution (1.0 M) was injected into the vial dropwisely. It is noted that the initial molar ratio between  $\text{Cu}^{+2}$  and  $\text{N}_2\text{H}_4$  was at a fixed value of 1:5 for all reductions. The entire process of reduction was carried under ambient room temperature and monitored by UV-vis spectroscopy. After 90 minutes of mild stirring, the reactions was then quenched by ice-water bath before further dilution for depositing onto TEM grids.

### Analytical techniques:

Shimadzu UV-1800 spectrometer was used to record the UV-vis spectra. Transmission Electron Microscopy (TEM) images were taken from a JEOL JEM-1400 TEM machine. Diameters and zeta-potential analysis of metal and colloidal  $\text{Cu}^{+2}$ /NaPA particles were accomplished by using a Malvern ZetaSizer Nano ZEN 5600.

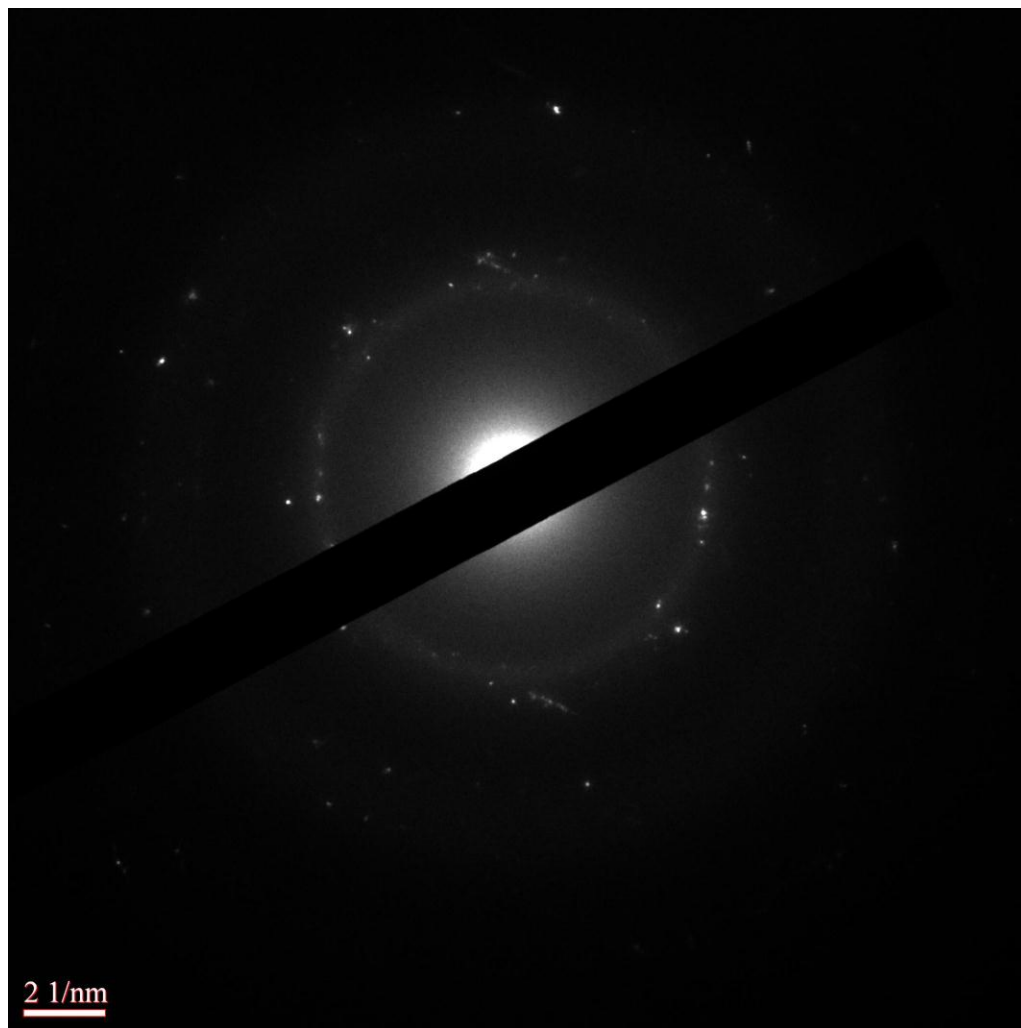

Figure S1. Electron diffraction image of the sample copper nanoparticles made in Figure S1. A featured ring for Cu lattice (1, 1, 1) with a diameter of  $9.6 \text{ nm}^{-1}$  was shown along with noise signals possibly attributed to residual polymer and  $\text{NaBF}_4$  salts.

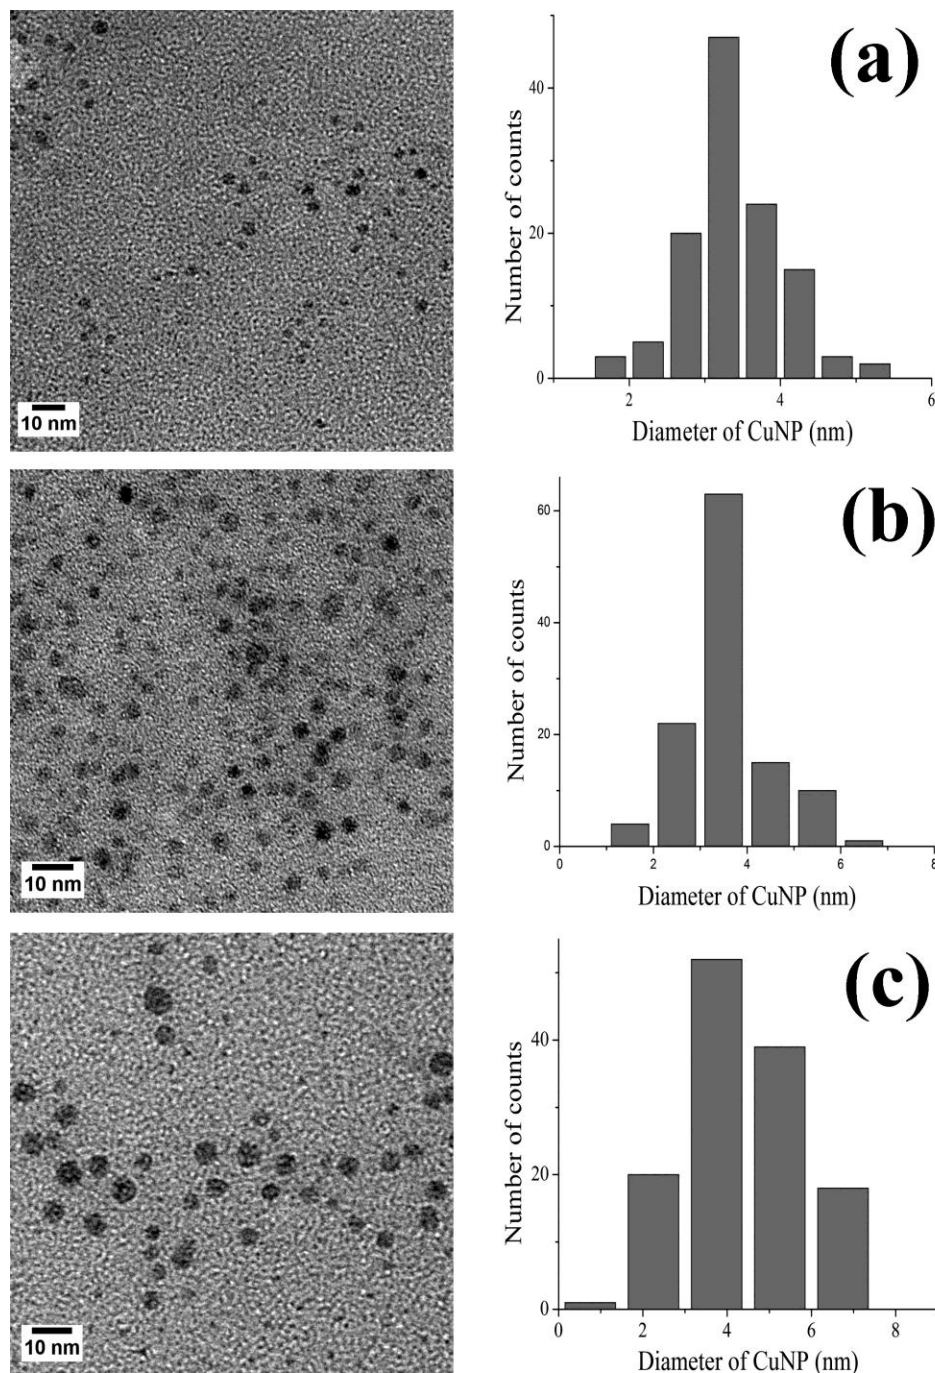

Figure S2. Reduction of  $\text{Cu}(\text{BF}_4)_2$  in the presence of sodium poly acrylate ( $M_w = 15,000$ ) at the initial pH = 4.8 and (a)  $[\text{Cu}(\text{BF}_4)_2]_i = 2.2 \times 10^{-2}$  M,  $[\text{Na-Pa}]_i = 1.2 \times 10^{-3}$  M; (b)  $[\text{Cu}(\text{BF}_4)_2]_i = 2.2 \times 10^{-2}$  M,  $[\text{Na-Pa}]_i = 1.0 \times 10^{-3}$  M; (c)  $[\text{Cu}(\text{BF}_4)_2]_i = 2.2 \times 10^{-2}$  M,  $[\text{Na-Pa}]_i = 7.3 \times 10^{-4}$  M, before 0.3mL hydrazine solution (1.0 M) was added. The diameters of CuNP were (a) $3.4 \pm 0.6$  nm, (b) $3.8 \pm 1.0$  nm and (c) $4.3 \pm 1.4$ nm.

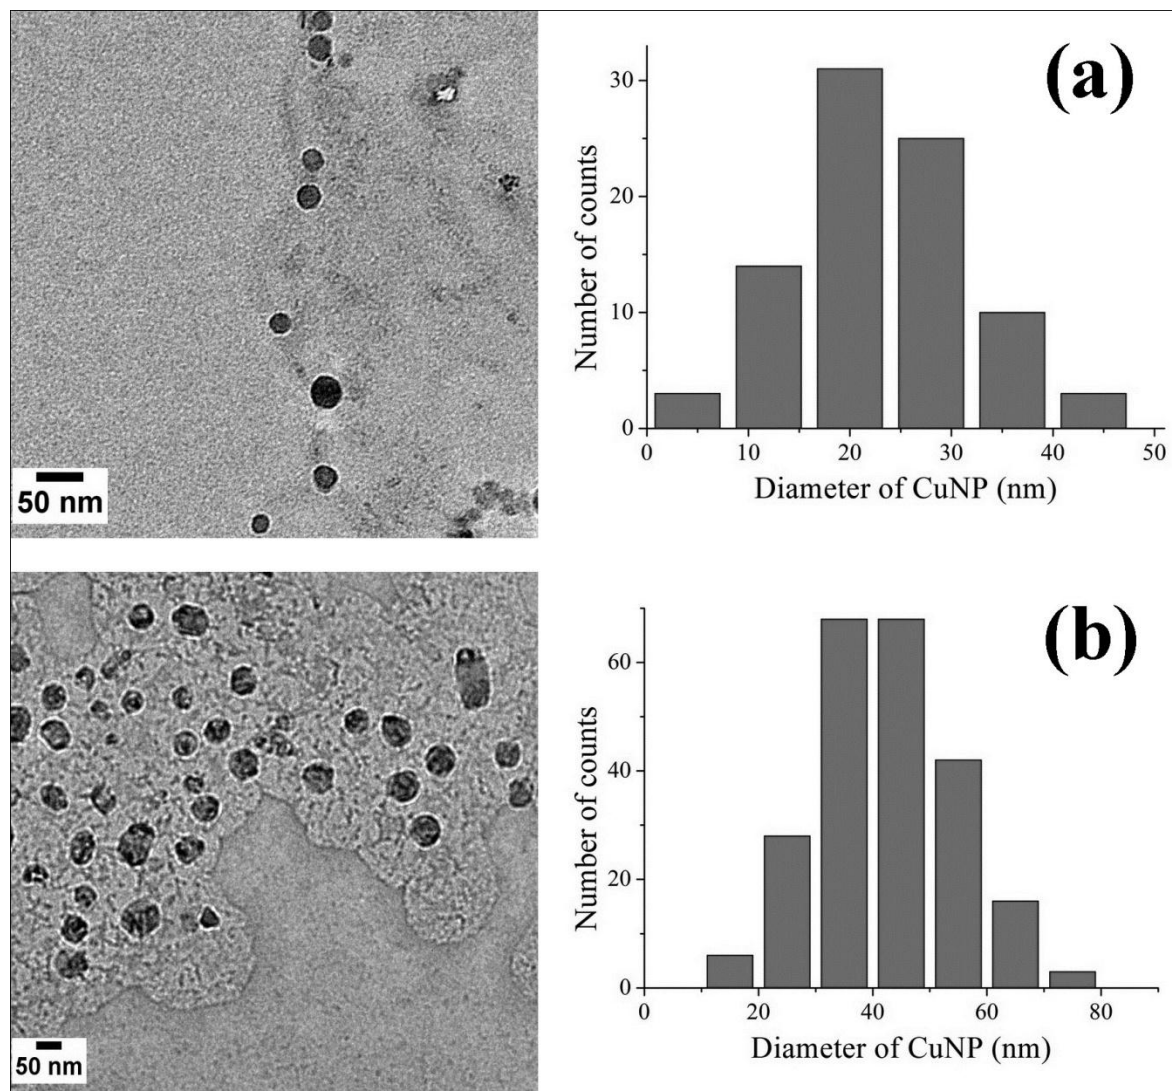

Figure S3: Reduction of  $\text{Cu}(\text{BF}_4)_2$  in the presence of sodium polyacrylate ( $M_w = 15,000$ ) at the initial pH = 4.8 and (a)  $[\text{Cu}(\text{BF}_4)_2]_i = 2.2 \times 10^{-2} \text{ M}$ ,  $[\text{Na-Pa}]_i = 2.5 \times 10^{-3} \text{ M}$ ; (b)  $[\text{Cu}(\text{BF}_4)_2]_i = 2.2 \times 10^{-2} \text{ M}$ ,  $[\text{Na-Pa}]_i = 6.1 \times 10^{-3} \text{ M}$ . The diameters of CuNP were (a)  $23 \pm 8.0 \text{ nm}$  and (b)  $42 \pm 12 \text{ nm}$ .

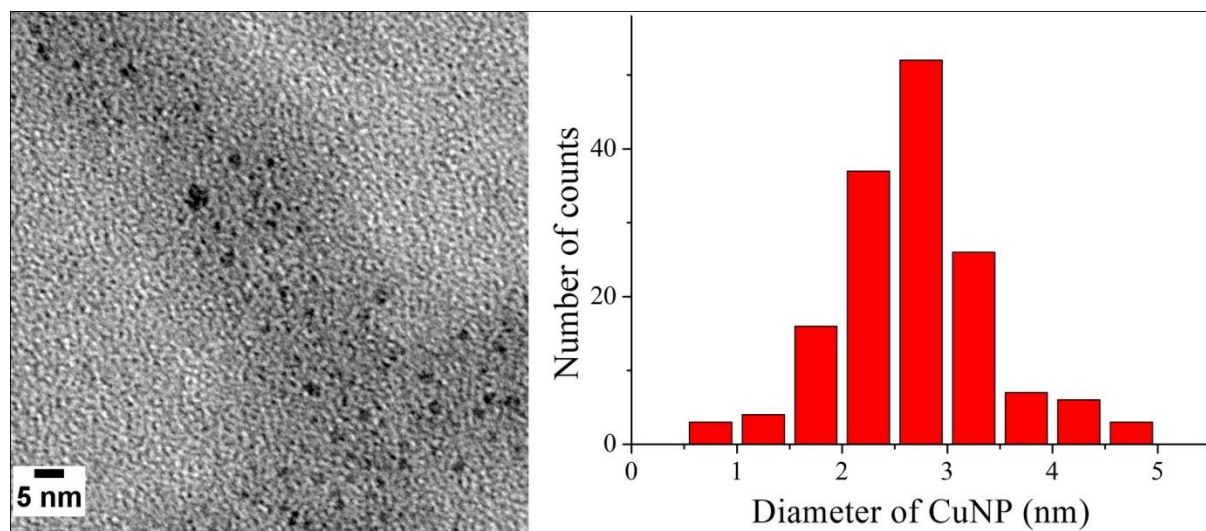

Figure S4. Reduction of  $\text{Cu}(\text{BF}_4)_2$  in colloidal  $\text{Cu}^{+2}/\text{NaPA}$  cross-linked networks in the presence of  $\text{CaCl}_2$  as co-crosslinker after 90 minutes reaction with 0.3 mL hydrazine solution (1.0 M). Initial concentrations are as following: (a)  $[\text{Cu}(\text{BF}_4)_2]_i = 1.7 \times 10^{-2}$  mol/L,  $[\text{CaCl}_2]_i = 5.5 \times 10^{-3}$  mol/L,  $[\text{NaPA}]_i = 1.1 \times 10^{-3}$  mol/L. The diameter of CuNP was  $2.7 \pm 0.7$  nm.
